# Supplementary material for: Parenting Cognition and Affective Outcomes Following Parent Management Training: A Systematic Review
Source: Springer Nature journal article supplement (doi:10.1007/s10567-016-0208-z), 2016-07-08
Supplement: MOESM1 [file 10349500]

Table 3.

*Supplemental Information on Reviewed Studies*

| Authorship | Child age (years) | Child gender ratio (M:F) | Primarily ADHD? | No. of sessions | PMT approach | Treatment format | Outcome measures used |
| --- | --- | --- | --- | --- | --- | --- | --- |
| Anastopoulos et al.,  1993 | 6-11 | 25:9 | yes | 9 | Defiant Children | Individual | Parenting Stress Index  Symptom Checklist 90-Revised  Locke-Wallace Marital Adjustment Scale  Parenting Sense of Competence Scale |
| Axberg & Broberg,  2012 | 4-8 | 52:10 | no | 12-14 | The Incredible Years Parent Training | Group | Symptom Checklist  Parenting Alliance Measure  Parental Locus of Control |
| Azevedo et al., 2013 | 3-6 | 72:28 | yes | 12-14 | The Incredible Years Parent Training | Group | Parenting Sense of Competence Scale |
| Azevedo et al., 2014 | 3-6 | 27:15 | yes | 12-14 | The Incredible Years Parent Training | Group | Parenting Sense of Competence Scale |
| Babinski et al., 2014 | 6-12 | 10:2 | yes | 8 | Defiant Children | Individual | Caregiver Strain Questionnaire  Beck Depression Inventory-Second Edition |
| Barkley et al., 2000 | 4.5-6 | 105:53 | yes | 10 | Defiant Children | Group | Parenting Sense of Competence Scale |
| Bor et al., 2002 | 3-4 | 59:28 | yes | 10-12 | Standard Triple P | Individual | Depression Anxiety Stress Scales  Parenting Sense of Competence Scale |
| Boyle et al., 2010 | 3-7 | 4:6 | no | 4 | Primary Care Triple P | Individual | Parenting Experiences Survey  Parenting Tasks Checklist |
| Chacko et al., 2009 | 4-9 | 85:35 | yes | 9 | Developed for study based on empirically-supported interventions | Group | Beck Depression Inventory |
| Connell et al., 1997 | 2-6 | 10:13 | no | n/a | Self-directed Triple P | Individual | Depression Anxiety Stress Scales  Parenting Sense of Competence Scale |
| Costin et al., 2004 | *M* = 9.8 | 37:3 | no | 8 | Based on Defiant Children,  Skills Training for Children with Behaviour Disorders: A Parent and Therapist Guidebook | Group | General Health Questionnaire-28 |
| Danforth, 1998 | 4-7 | 5:3 | yes | 8 | Behavior Management Flowchart | Individual | Parenting Stress Index |
| Danforth, 2000 | 4.0 | 2:0 | yes | 8 | Behavior Management Flowchart | Individual | Parenting Stress Index |
| Dubey et al., 1983 | 6-10 | 32:5 | yes | 9 | Parents are Teachers | Group | Hereford Parent Attitude Scale |
| Gallart & Matthey,  2005 | 2-8 | 37:12 | no | 4 + 4 phone calls | Standard or Enhanced Triple P | Group | Depression Stress Anxiety Scales |
| Gardner et al., 2006 | 2-9 | 56:20 | no | 14 | The Incredible Years Parent Training | Group | Beck Depression Inventory  Parenting Sense of Competence Scale |
| Hanisch et al., 2014 | 3-6 | Not reported | no | 10 | Prevention Program for Externalizing Behavior | Group | Depression Anxiety Stress Scales  Self-Efficacy Scales |
| Homem et al., 2014 | 3-6 | 30:6 | no | 14 | The Incredible Years Parent Training | Group | Parenting Sense of Competence Scale |
| Hood & Eyberg, 2003 | 6-10 | 7:16 | no | *M* = 13 | Parent-Child Interaction Therapy | Individual | Beck Depression Inventory-Second Edition  Parent Locus of Control-Short Form |
| Horn et al., 1987 | 6-12 | Not reported | yes | Not reported | Living with Children: New Methods for Parents and Teachers | Group | Parenting Partner subscale from Social Role  Performance Inventory  Parent Attitudes Toward Child Rearing |
| Hutchings et al., 2007 | 3-5 | 89:64 | no | 12 | The Incredible Years Parent Training | Group | Beck Depression Inventory |
| Ise et al., 2015 | *M* = 6.4 | 10:15 | no | 11 weeks | Bibliotherapy (German) | Individual | Depression Anxiety Stress Scale |
| Kazdin et al., 1992 | 7-13 | 76:21 | no | 16 | A Social Learning Approach to Family Intervention | Individual | Beck Depression Inventory  Symptom Checklist-90 |
| Kierfeld et al., 2013 | 3-6 | 24:24 | no | 11 weeks | Bibliotherapy (German) | Individual | Questionnaire on Judging Parental Strains  Depression Anxiety Stress Scales  Problem Setting and Behavior Checklist |
| Kjøbli & Ogden,  2012 | 3-12 | 147:69 | no | 3-5 | Based on Parent Management Training Oregon Model | Individual | Symptom Checklist-5 |
| Lees & Ronan, 2008 | 6-9 | 4:0 | yes | 20 | The Incredible Years Parent Training | Individual | Beck Depression Inventory |
| Leung et al., 2003 | 3-7 | 44:25 | no | 4 + 4 phone calls | Standard Triple P | Group | Relationship Quality Index  Parent Problem Checklist  Parenting Sense of Competence Scale |
| Markie-Dadds &  Sanders, 2006 | 2-5 | 40:23 | no | 10 weeks | Self-directed Triple P | Individual | Depression Anxiety Stress Scales  Parenting Sense of Competence Scale |
| Matos et al., 2009 | 4-6 | Not reported | yes | Max. of 17 | Parent-Child Interaction Therapy | Individual | Beck Depression Inventory (Spanish) |
| McGilloway et al.,  2012 | 3-7 | 90:59 | no | 14 | The Incredible Years Parent Training | Group | Beck Depression Inventory |
| McGilloway et al.,  2014 | 3-7 | 60:43 | no | 14 | The Incredible Years Parent Training | Group | Beck Depression Inventory |
| Nixon et al., 2003 | 6-12 | 38:16 | no | 5 or 12 | Parent-Child Interaction Therapy | Individual | Parental Locus of Control  Parenting Sense of Competence |
| Pisterman et al., 1992 | *M* = 4.1 | 78:13 | yes | 12 | Based on Defiant Children, Helping the Noncompliant Child | Group | Parenting Stress Index  Parenting Sense of Competence Scale |
| Sanders et al., 2000 | 3-4 | 268:37 | no | 10 (standard) | Standard or Enhanced or Self-Directed Triple P | Individual | Depression Anxiety Stress Scales  Abbreviated Dyadic Adjustment Scale  Parenting Sense of Competence Scale |
| Sanders et al., 2007 | 3-4 | 268:37 | no | 10 (standard) | Standard or Enhanced or Self-Directed Triple P | Individual | Depression Anxiety Stress Scales  Abbreviated Dyadic Adjustment Scale  Parenting Sense of Competence Scale |
| Sanders et al., 2012 | 2-9 | 78:38 | no | n/a | Triple P Online | Individual | Depression Anxiety Stress Scales  Parental Anger Inventory  Parent Problem Checklist  Parenting Tasks Checklist |
| Schumann et al., 1998 | 3-6 | 52:12 | no | *M* = 13 | Parent-Child Interaction Therapy | Individual | Parenting Stress Index  Beck Depression Inventory  Dyadic Adjustment Scale  Parental Locus of Control |
| Sonuga-Barke et al.,  2001 | 3 | 48:30 | yes | 8 | PMT unspecified | Individual | General Health Questionnaire-30  Parenting Sense of Competence Scale |
| Sonuga-Barke et al.,  2004 | 3 | Not reported | yes | 8 | PMT unspecified | Individual | General Health Questionnaire-30  Parenting Sense of Competence Scale |
| Spaccarelli et al.,  1992 | *M* = 6.1 | 30:23 | no | 10 hours | The Incredible Years Parent Training | Group | Parenting Stress Index |
| Stattin et al., 2015 | 3-12 | Approx. 599:309 | no | 11, 10, or 12 | Comet, Cope, or The Incredible Years | Group | Caregiver Strain Questionnaire  Center of Epidemiological Studies-Depression Scale  Attempted Understanding Scale  Parenting Sense of Competence Scale |
| Tucker et al., 1998 | 2-3 | 20:3 | no | 10-12 | The Incredible Years Parent Training | Group | Parenting Stress Index  Toddler Care Questionnaire |
| Turner & Sanders,  2006 | 2-6 | 16:14 | no | 3-4 | Triple P Primary Care | Individual | Depression Anxiety Stress Scales  Parenting Sense of Competence Scale |
| van den Hoofdakker  et al., 2007 | 4-12 | 76:22 | yes | 12 | Based on Defiant Children, Helping the Noncompliant Child | Group | Parenting Stress Index |
| Webster-Stratton, et  al., 1988 | 3-8 | 79:35 | no | 10-12 | The Incredible Years Parent Training | Group | Parenting Stress Index |
| Webster-Stratton, et  al., 1989 | 3-8 | Not reported | no | 10-12 | The Incredible Years Parent Training | Group | Parenting Stress Index |
| Webster-Stratton &  Herman, 2008 | 3-8 | 142:39 | no | 10-12 | The Incredible Years Parent Training | Group | Parenting Stress Index |
| Wells & Egan, 1988 | 3-8 | Not reported | no | 8-12 | Social Learning Parent Training | Individual | Beck Depression Inventory  State-Trait Anxiety Inventory  Locke-Wallace Marriage Inventory |
